# Supplementary material for: Gradient SERS Substrates with Multiple Resonances for Analyte Screening: Fabrication and SERS Applications
Source: MDPI journal article supplement (doi:10.3390/molecules27165097), 2022-08-10
Supplement: s1 [file s1]

# Gradient SERS substrates with multiple resonances for analyte screening: Fabrication and SERS applications

Ashutosh Mukherjee <sup>1,2,3</sup>, Quan Liu <sup>3,4</sup>, Frank Wackenhut <sup>1,2,\*</sup>, Fang Dai <sup>5,6</sup>, Monika Fleischer <sup>5,6</sup>, Pierre-Michel Adam <sup>4,\*</sup>, Alfred J. Meixner <sup>3,6</sup> and Marc Brecht <sup>1,2,3,6,\*</sup>

<sup>1</sup> Center for Process Analysis and Technology (PA&T), School of Applied Chemistry, Reutlingen University, 72762 Reutlingen, Germany; ashutosh.mukherjee@reutlingen-university.de

<sup>2</sup> Reutlingen Research Institute (RRI), Reutlingen University, 72762 Reutlingen, Germany

<sup>3</sup> Institute of Physical and Theoretical Chemistry, Eberhard Karls University of Tübingen, 72076 Tübingen, Germany; quan.liu@uni-tuebingen.de (Q.L.); alfred.meixner@uni-tuebingen.de (A.J.M.)

<sup>4</sup> Laboratory Light, nanomaterials & nanotechnologies–L2n and CNRS EMR 7004, University of Technology of Troyes, 10000 Troyes, France

<sup>5</sup> Institute for Applied Physics, Eberhard Karls University of Tübingen, 72076 Tübingen, Germany; daifang1990@gmail.com (F.D.); monika.fleischer@uni-tuebingen.de (M.F.)

<sup>6</sup> Center for Light-Matter-Interaction, Sensors and Analytics (LISA+), Eberhard Karls University of Tübingen, 72076 Tübingen, Germany

\* Correspondence: frank.wackenhut@reutlingen-university.de (F.W.); pierre\_michel.adam@utt.fr (P.-M.A.); marc.brecht@reutlingen-university.de (M.B.)

**Substrate 1**

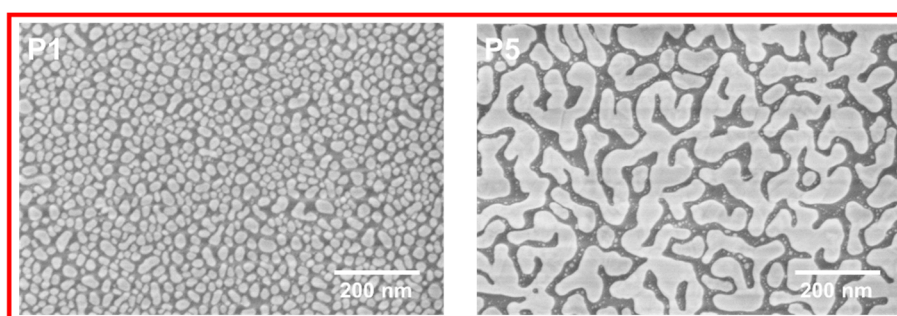

**Substrate 2**

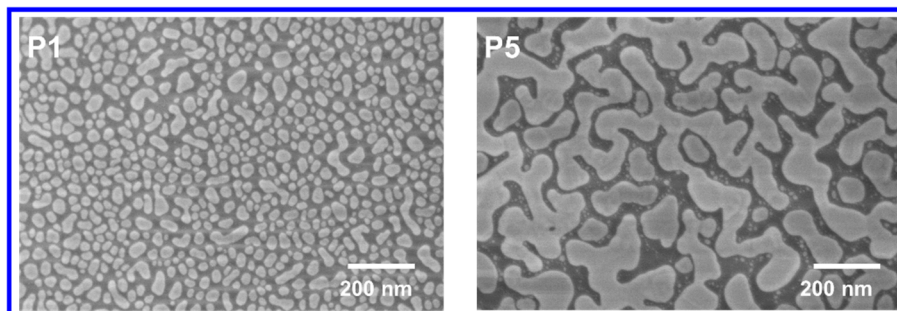

**Figure S1.** SEM images of different fabricated substrates (substrate 1 - red and substrate 2 - blue) at the same positions P1 and P5 to denote micro- and nano scale reproducibility.

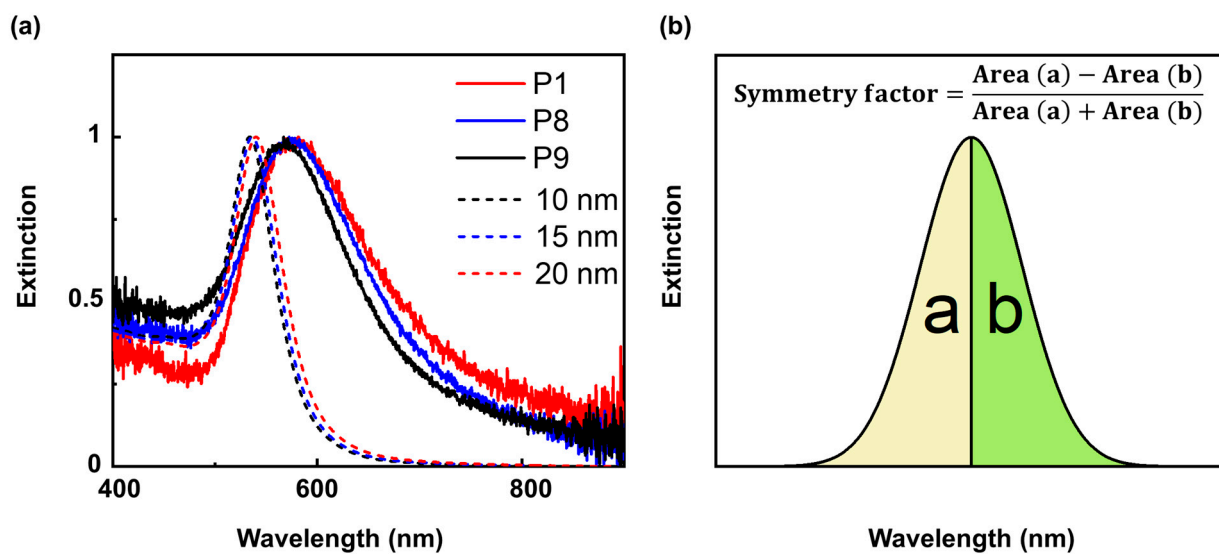

**Figure S2.** (a) Normalized extinction spectra at points P1, P8, and P9 (solid lines – red, blue, black) compared to normalized simulated extinction spectra from Mie theory for spherical gold NPs with radii of 10 nm, 15 nm, and 20 nm (dashed lines – red, blue, black), and (b) schematic and equation to determine the symmetry factor of an extinction curve.
